# Supplementary material for: The effect of ginger (Zingiber officinale) supplementation on clinical, biochemical, and anthropometric parameters in patients with multiple sclerosis: a double-blind randomized controlled trial
Source: Royal Society of Chemistry journal article supplement (doi:10.1039/d3fo00167a), 2023-01-01
Supplement: d3fo00167a1.xlsx [file d3fo00167a1.xlsx]

## Sheet: Ginger & MS - ITT
Code	Group	Age	Gender	Marital.Status	Education.Status	Job	Smoking	Alcohol.Consumption	Vitamin.D.Supplementation	MS.Duration	Disease.Modifying.Therapies	Rituximab	Teriflunomide	Dimethyl.Fumarate	Glatiramer.Acetate	Interferon.Beta	Natalizumab	Fingolimod	Ocrelizumab	EDSS.1	EDSS.2	EDSS.Change	BMI.1	BMI.2	BMI.Change	MSIS.29.Physical.1.Scale.100	MSIS.29.Physical.2.Scale.100	MSIS.29.Physical.Change	MSIS.29.Physical.1.Sqrt	MSIS.29.Physical.2.Sqrt	MSIS.29.Psychological.1.Scale.100	MSIS.29.Psychological.2.Scale.100	MSIS.29.Psychological.Change	IL17.1	IL17.2	IL17.Change	MMP9.1	MMP9.2	MMP9.Change	MMP9.1.Power2	MMP9.2.Power2	NFL.1	NFL.2	NFL.Change	NFL.1.Power2	NFL.2.Power2	NLR.1	NLR.2	NLR.Change
1	1	30	1	2	1	2	1	2	1	2	1	1	2	2	2	2	2	2	2	4.5	4.5	0	22.6852	22.6852	0	42.5	46.25	3.75	6.5192	6.80074	80.5556	80.5556	0	81.401	74.249	-7.152	776.87	981.62	204.75	603527	963578	7.881	9.904	2.023	62.1102	98.0892	1.83987	1.83882	-0.00105349
2	2	38	2	2	1	1	2	2	2	4	1	1	2	2	2	2	2	2	2	4.5	4.5	0	20.3074	20.9551	0.647736	23.75	27.5	3.75	4.8734	5.24404	16.6667	22.2222	5.55556	106.92	108.51	1.59	1280.3	1316.5	36.2	1.63917e+06	1.73317e+06	13.303	13.982	0.679	176.97	195.496	4.04211	4.36842	0.326316
3	2	36	2	2	2	4	2	1	1	4	1	2	2	2	2	1	2	2	2	1.5	1.5	0	19.9594	20.5037	0.544346	10	5	-5	3.16228	2.23607	22.2222	16.6667	-5.55556	65.659	85.585	19.926	1208.6	1267.5	58.9	1.46071e+06	1.60656e+06	12.058	12.818	0.76	145.395	164.301	1.03191	1.14188	0.109962
4	1	35	2	2	2	1	2	2	1	7	1	2	1	2	2	2	2	2	2	1.5	0	-1.5	29.761	29.9136	0.15262	25	5	-20	5	2.23607	63.8889	25	-38.8889	112.94	104.49	-8.45	1383	1220.2	-162.8	1912689	1.48889e+06	14.513	12.777	-1.736	210.627	163.252	2.37091	1.41114	-0.959769
5	1	38	2	2	2	2	2	2	1	2	1	2	1	2	2	2	2	2	2	1	1	0	23.255	22.2291	-1.02596	12.5	2.5	-10	3.53553	1.58114	58.3333	8.33333	-50	43.932	44.929	0.997	492.93	467.89	-25.04	242980	218921	4.679	4.153	-0.526	21.893	17.2474	1.65043	1.70732	0.0568873
6	1	43	2	2	1	1	2	2	1	6	1	1	2	2	2	2	2	2	2	2.5	1	-1.5	20.9837	22.7036	1.71997	0	0	0	0	0	13.8889	0	-13.8889	122.35	114.88	-7.47	1393.2	1304.6	-88.6	1.94101e+06	1.70198e+06	14.357	13.477	-0.88	206.123	181.63	1.66364	1.44058	-0.223057
7	2	36	2	2	1	1	2	2	2	12	1	1	2	2	2	2	2	2	2	1	1.5	0.5	34.2936	33.722	-0.571559	23.75	26.25	2.5	4.8734	5.12348	55.5556	77.7778	22.2222	90.21	89.49	-0.72	1193.6	1187.7	-5.9	1.42468e+06	1.41063e+06	12.204	12.308	0.104	148.938	151.487	1.98294	2.44275	0.459813
8	2	27	2	2	2	2	2	2	1	2	1	2	2	2	1	2	2	2	2	1	1	0	17.2248	16.8242	-0.400577	15	11.25	-3.75	3.87298	3.3541	5.55556	8.33333	2.77778	50.216	50.249	0.033	613.3	658.82	45.52	376137	434044	5.591	5.784	0.193	31.2593	33.4547	2.87815	1.43175	-1.4464
9	1	42	1	2	1	4	1	2	1	7	1	2	2	1	2	2	2	2	2	1	1	0	17.2074	17.4747	0.267299	5	10	5	2.23607	3.16228	25	16.6667	-8.33333	85.667	79.467	-6.2	1056.6	1055	-1.6	1.1164e+06	1113025	10.886	10.869	-0.017	118.505	118.135	1.38611	1.84762	0.461508
10	2	38	1	2	1	4	2	2	1	4.5	1	2	2	2	1	2	2	2	2	1.5	1.5	0	27.1755	27.3131	0.137598	27.5	28.75	1.25	5.24404	5.3619	72.2222	86.1111	13.8889	89.812	82.368	-7.444	1027.6	1026.5	-1.1	1.05596e+06	1.0537e+06	10.511	10.24	-0.271	110.481	104.858	0.847534	0.990338	0.142805
11	2	31	2	1	2	3	1	1	1	5	2	2	2	2	2	2	2	2	2	2	2	0	40.0832	40.3011	0.217844	38.75	62.5	23.75	6.22495	7.90569	83.3333	100	16.6667	91.902	85.856	-6.046	1165.9	1103.7	-62.2	1.35932e+06	1.21815e+06	11.664	11.198	-0.466	136.049	125.395	1.43782	1.29508	-0.142742
12	1	36	2	2	2	1	2	2	2	10	1	1	2	2	2	2	2	2	2	3	1	-2	28.8933	28.167	-0.726369	11.25	3.75	-7.5	3.3541	1.93649	44.4444	0	-44.4444	89.741	82.672	-7.069	1087.6	1177.5	89.9	1.18287e+06	1.38651e+06	10.782	11.678	0.896	116.252	136.376	2.37358	3.57214	1.19855
13	1	31	2	2	2	4	2	1	1	1.5	1	2	2	2	1	2	2	2	2	1.5	1.5	0	22.4913	23.1488	0.657439	18.75	22.5	3.75	4.33013	4.74342	83.3333	88.8889	5.55556	55.037	60.229	5.192	667.14	755.01	87.87	445076	570040	6.919	7.59	0.671	47.8726	57.6081	1.33086	1.21395	-0.116911
14	2	49	2	2	2	4	2	2	1	20	2	2	2	2	2	2	2	2	2	0	0	0	37.5324	37.1513	-0.381039	2.5	1.25	-1.25	1.58114	1.11803	2.77778	8.33333	5.55556	58.534	59.769	1.235	796.66	820.28	23.62	634667	672859	8.095	8.089	-0.006	65.529	65.4319	1.02283	1.41417	0.391338
15	1	46	2	2	1	1	2	2	2	21	1	1	2	2	2	2	2	2	2	1	1	0	31.8443	31.8443	0	55	18.75	-36.25	7.4162	4.33013	36.1111	13.8889	-22.2222	98.77	95.52	-3.25	1075.3	986.27	-89.03	1.15627e+06	972729	10.515	9.617	-0.898	110.565	92.4867	2.94828	2.00656	-0.941718
16	2	25	2	1	1	3	2	2	1	1	1	2	2	1	2	2	2	2	2	1.5	1.5	0	27.5838	27.4102	-0.173604	0	0	0	0	0	8.33333	25	16.6667	86.531	88.239	1.708	977.35	1038.3	60.95	955213	1.07807e+06	10.042	10.82	0.778	100.842	117.072	1.9898	1.67656	-0.313238
17	1	38	1	2	1	2	2	2	1	2	1	1	2	2	2	2	2	2	2	4.5	4.5	0	31.4564	30.7129	-0.743516	33.75	38.75	5	5.80948	6.22495	55.5556	58.3333	2.77778	94.719	91.659	-3.06	1080.4	869.89	-210.51	1.16726e+06	756709	10.79	8.631	-2.159	116.424	74.4942	2.04467	2.23675	0.192076
18	2	29	1	2	2	3	1	2	1	3	1	2	2	2	1	2	2	2	2	1	1	0	26.0449	26.465	0.42008	8.75	11.25	2.5	2.95804	3.3541	44.4444	47.2222	2.77778	29.189	29.425	0.236	360.38	388.39	28.01	129874	150847	3.573	3.863	0.29	12.7663	14.9228	1.96203	1.86957	-0.0924601
19	2	40	1	2	2	4	1	2	2	1	1	2	2	1	2	2	2	2	2	0	0	0	27.4717	28.3825	0.910747	3.75	3.75	0	1.93649	1.93649	25	25	0	87.885	94.201	6.316	1469.2	1175.6	-293.6	2.15855e+06	1.38204e+06	14.848	11.999	-2.849	220.463	143.976	4.8481	3.71134	-1.13676
20	1	33	2	2	1	1	1	2	1	5	1	2	2	2	2	1	2	2	2	2	1	-1	25.3968	25.7999	0.403124	26.25	11.25	-15	5.12348	3.3541	41.6667	44.4444	2.77778	100.17	95.717	-4.453	1238	1173.9	-64.1	1532644	1.37804e+06	12.581	12.039	-0.542	158.282	144.938	2.2809	1.39447	-0.886427
21	2	25	2	1	2	4	1	2	1	1	1	1	2	2	2	2	2	2	2	1.5	2	0.5	24.1117	24.5554	0.443656	2.5	7.5	5	1.58114	2.73861	27.7778	61.1111	33.3333	72.925	93.334	20.409	1118.8	1213.9	95.1	1.25171e+06	1.47355e+06	11.194	12.308	1.114	125.306	151.487	1.33773	1.08458	-0.253154
22	1	38	2	2	2	1	2	2	1	9	1	2	2	2	2	1	2	2	2	1.5	1	-0.5	21.6797	21.6797	0	3.75	2.5	-1.25	1.93649	1.58114	33.3333	22.2222	-11.1111	74.581	73.607	-0.974	1119.1	1187.9	68.8	1.25238e+06	1.41111e+06	10.707	11.425	0.718	114.64	130.531	1.70154	2.18045	0.478913
23	2	35	2	2	2	1	2	2	1	1	1	2	2	1	2	2	2	2	2	1.5	1.5	0	20.8984	20.9375	0.0390625	8.75	6.25	-2.5	2.95804	2.5	13.8889	16.6667	2.77778	84.151	90.242	6.091	979.56	943.49	-36.07	959538	890173	10.225	9.523	-0.702	104.551	90.6875	0.902083	0.793169	-0.108914
24	1	40	2	2	2	2	2	2	1	10	1	1	2	2	2	2	2	2	2	1.5	1.5	0	19.7777	20.3908	0.613109	11.25	3.75	-7.5	3.3541	1.93649	38.8889	11.1111	-27.7778	79.355	81.582	2.227	1088.8	1016.4	-72.4	1.18549e+06	1.03307e+06	10.735	9.994	-0.741	115.24	99.88	2.27402	2.50183	0.22781
25	2	40	2	2	2	1	2	2	1	13	1	2	2	2	2	2	2	1	2	2.5	2.5	0	23.3067	23.1095	-0.19721	32.5	42.5	10	5.70088	6.5192	33.3333	38.8889	5.55556	91.146	84.498	-6.648	1170.6	1173.6	3	1.3703e+06	1.37734e+06	12.149	12.37	0.221	147.598	153.017	5.84553	3.9027	-1.94283
26	1	40	2	2	1	1	2	2	1	4	1	2	2	2	2	1	2	2	2	1	1	0	23.0332	23.0332	0	31.25	37.5	6.25	5.59017	6.12372	63.8889	47.2222	-16.6667	94.727	92.317	-2.41	1237.7	1216.2	-21.5	1.5319e+06	1.47914e+06	12.313	11.977	-0.336	151.61	143.449	2.80851	2.59108	-0.217433
27	2	44	2	1	1	1	2	2	1	11	1	2	2	2	2	2	2	1	2	1	1	0	27.2874	27.6638	0.376378	1.25	2.5	1.25	1.11803	1.58114	25	13.8889	-11.1111	97.71	99.36	1.65	1138.6	1135.7	-2.9	1.29641e+06	1.28981e+06	11.611	11.603	-0.008	134.815	134.63	8.19101	11.4179	3.2269
28	1	43	2	2	2	1	1	2	1	12.5	2	2	2	2	2	2	2	2	2	1	1	0	25.4581	24.974	-0.484062	2.5	2.5	0	1.58114	1.58114	5.55556	0	-5.55556	93.139	92.215	-0.924	1114.2	1183.1	68.9	1.24144e+06	1.39973e+06	10.932	11.951	1.019	119.509	142.826	1.41379	1.40897	-0.00482213
29	1	26	2	1	2	3	2	2	1	4	1	2	2	1	2	2	2	2	2	1	0	-1	27.7669	28.2484	0.481506	8.75	2.5	-6.25	2.95804	1.58114	58.3333	52.7778	-5.55556	86.749	79.626	-7.123	929.49	904.4	-25.09	863952	817939	9.214	8.793	-0.421	84.8978	77.3168	1.19024	1.11283	-0.077412
30	2	39	2	2	1	4	2	2	1	1	1	2	2	1	2	2	2	2	2	2	2	0	29.8618	28.5382	-1.32361	5	27.5	22.5	2.23607	5.24404	5.55556	27.7778	22.2222	73.937	75.482	1.545	1060.1	1096.4	36.3	1.12381e+06	1.20209e+06	11.116	11.445	0.329	123.565	130.988	1.00221	1.23114	0.228936
31	1	48	1	2	2	4	2	2	1	6	1	1	2	2	2	2	2	2	2	1	0	-1	29.0688	28.3677	-0.70107	25	25	0	5	5	44.4444	63.8889	19.4444	92.49	89.35	-3.14	1020.9	1007.2	-13.7	1.04224e+06	1.01445e+06	10.57	10.407	-0.163	111.725	108.306	1.7947	1.45833	-0.336369
32	2	35	1	1	2	4	2	1	1	12	1	2	2	2	2	2	2	1	2	3.5	3.5	0	28.9262	29.9489	1.02264	21.25	20	-1.25	4.60977	4.47214	41.6667	47.2222	5.55556	76.869	72.589	-4.28	1030.1	1156.6	126.5	1.06111e+06	1.33772e+06	10.56	11.717	1.157	111.514	137.288	1.41667	1.40547	-0.011194
33	2	30	2	1	2	4	1	1	1	6	1	1	2	2	2	2	2	2	2	0	1	1	39.8991	39.8991	0	27.5	40	12.5	5.24404	6.32456	63.8889	83.3333	19.4444	89.931	96.02	6.089	1044.5	1134.1	89.6	1.09098e+06	1.28618e+06	10.673	11.59	0.917	113.913	134.328	3.07373	10.3218	7.24811
34	1	33	2	2	1	1	1	1	2	10	1	1	2	2	2	2	2	2	2	4.5	4	-0.5	17.9089	19.8141	1.9052	90	20	-70	9.48683	4.47214	91.6667	30.5556	-61.1111	83.96	77.63	-6.33	1109	1096.3	-12.7	1229881	1.20187e+06	11.095	11.018	-0.077	123.099	121.396	2.428	2.20769	-0.220308
35	2	30	2	2	2	2	2	2	1	9	1	2	2	2	2	2	2	1	2	1	1	0	22.1727	23.2629	1.09016	6.25	5	-1.25	2.5	2.23607	25	16.6667	-8.33333	84.642	84.955	0.313	1035.8	1086.6	50.8	1.07288e+06	1.1807e+06	10.72	10.796	0.076	114.918	116.554	6.69492	9.48352	2.7886
36	1	38	2	2	1	1	2	2	1	1	1	2	2	2	2	2	1	2	2	2	1.5	-0.5	27.993	28.3987	0.405696	25	11.25	-13.75	5	3.3541	86.1111	77.7778	-8.33333	90.946	94.194	3.248	1170.7	1232.3	61.6	1.37054e+06	1.51856e+06	11.975	12.342	0.367	143.401	152.325	1.17734	0.664783	-0.512556
37	2	47	2	2	2	2	2	2	1	11	1	2	2	2	2	1	2	2	2	2	2	0	27.7902	28.0336	0.243418	1.25	27.5	26.25	1.11803	5.24404	52.7778	58.3333	5.55556	87.622	89.112	1.49	1152.2	1150.8	-1.4	1.32756e+06	1.32434e+06	11.891	11.897	0.006	141.396	141.539	1.72923	3.75978	2.03055
38	1	32	2	1	1	4	2	2	1	4	1	2	2	2	2	2	2	1	2	1.5	1	-0.5	29.1016	28.125	-0.976562	26.25	13.75	-12.5	5.12348	3.7081	75	27.7778	-47.2222	89.224	81.69	-7.534	1213.3	1153.9	-59.4	1.4721e+06	1.33149e+06	12.517	11.612	-0.905	156.675	134.839	5.92	6.9661	1.0461
39	2	37	1	1	2	2	2	2	1	5.5	1	2	2	2	2	2	2	1	2	3	3	0	25.4578	25.0311	-0.426667	22.5	17.5	-5	4.74342	4.1833	27.7778	38.8889	11.1111	86.659	88.043	1.384	969.27	1024.3	55.03	939484	1.04919e+06	9.87	9.875	0.005	97.4169	97.5156	6.56349	4.97561	-1.58788
40	1	26	2	2	1	1	2	2	1	7	1	2	2	1	2	2	2	2	2	1	0	-1	25.3046	25.3046	0	23.75	7.5	-16.25	4.8734	2.73861	80.5556	50	-30.5556	82.506	78.766	-3.74	960.55	968.32	7.77	922656	937644	9.671	9.907	0.236	93.5282	98.1486	1.6414	1.51149	-0.129905
41	2	34	2	2	1	1	2	2	1	3	1	2	2	2	2	1	2	2	2	0	0	0	23.2377	23.1075	-0.130131	5	7.5	2.5	2.23607	2.73861	19.4444	22.2222	2.77778	67.237	62.1	-5.137	1098.7	1018.2	-80.5	1.20714e+06	1.03673e+06	10.111	10.075	-0.036	102.232	101.506	1.52761	4.86395	3.33634
42	2	33	2	2	1	1	2	2	1	6	1	2	1	2	2	2	2	2	2	1.5	1.5	0	20.7008	20.7008	0	0	0	0	0	0	11.1111	5.55556	-5.55556	66.933	68.859	1.926	1017.2	1369.4	352.2	1.0347e+06	1.87526e+06	10.431	14.047	3.616	108.806	197.318	2.1661	1.50273	-0.663369
43	1	43	2	2	1	1	2	2	2	12	1	2	2	2	2	1	2	2	2	1	0	-1	30.8112	30.6362	-0.175064	7.5	5	-2.5	2.73861	2.23607	19.4444	5.55556	-13.8889	78.074	76.774	-1.3	1120	1042.8	-77.2	1254400	1.08743e+06	11.429	10.401	-1.028	130.622	108.181	1.01522	0.919255	-0.0959627
44	1	40	2	2	1	1	2	2	1	8.5	1	2	2	2	2	1	2	2	2	0	0	0	36.18	35.0781	-1.10193	3.75	0	-3.75	1.93649	0	2.77778	0	-2.77778	67.259	72.397	5.138	1009.3	942.27	-67.03	1.01869e+06	887873	10.105	9.348	-0.757	102.111	87.3851	1.76923	1.74375	-0.0254808
45	2	33	1	1	2	4	2	2	2	2.5	1	1	2	2	2	2	2	2	2	2	2	0	18.6628	18.3642	-0.298606	12.5	16.25	3.75	3.53553	4.03113	38.8889	41.6667	2.77778	92.836	92.483	-0.353	1120.2	1141.7	21.5	1.25485e+06	1.30348e+06	11.053	11.762	0.709	122.169	138.345	1.06132	1.1038	0.0424767
46	2	38	2	2	2	2	1	1	1	9	1	2	2	2	2	1	2	2	2	1	1	0	23.0469	23.4375	0.390625	5	7.5	2.5	2.23607	2.73861	13.8889	11.1111	-2.77778	84.48	84.667	0.187	948.72	1119.5	170.78	900070	1.25328e+06	9.517	11.25	1.733	90.5733	126.562	1.19756	1.68208	0.48452
47	1	25	2	1	2	3	2	2	1	3	1	2	2	2	2	2	2	2	1	2	1	-1	17.8926	18.424	0.531463	25	16.25	-8.75	5	4.03113	38.8889	19.4444	-19.4444	78.658	74.048	-4.61	1064	1291.1	227.1	1132096	1.66694e+06	11.385	13.233	1.848	129.618	175.112	0.778947	0.64486	-0.134088
48	1	30	1	1	2	4	2	1	1	2	1	2	2	2	2	1	2	2	2	1.5	1	-0.5	19.1108	19.1108	0	13.75	12.5	-1.25	3.7081	3.53553	44.4444	38.8889	-5.55556	59.771	51.133	-8.638	920.71	937.89	17.18	847707	879638	9.104	9.55	0.446	82.8828	91.2025	1.83	0.928731	-0.901269
49	1	39	2	2	2	1	2	2	1	10	1	2	2	1	2	2	2	2	2	1.5	1.5	0	29.5306	29.5306	0	26.25	26.25	0	5.12348	5.12348	25	19.4444	-5.55556	88.874	83.025	-5.849	1153	1120.7	-32.3	1329409	1.25597e+06	11.566	11.463	-0.103	133.772	131.4	1.37701	1.54896	0.171956
50	1	36	1	1	1	3	2	1	2	2	1	1	2	2	2	2	2	2	2	3.5	3	-0.5	23.9464	24.06	0.11364	10	6.81	-3.19	3.16228	2.6096	0	0	0	90.886	87.046	-3.84	1156.9	1131.84	-25.06	1.33842e+06	1.28106e+06	11.573	10.968	-0.605	133.934	120.297	1.76829	1.45946	-0.308833
51	2	42	2	2	1	1	2	2	1	14	1	2	2	1	2	2	2	2	2	1	1	0	25.9701	26.1	0.129884	1.25	10.29	9.04	1.11803	3.2078	13.8889	21.99	8.10111	67.87	70.658	2.788	1206.7	1209.05	2.35	1.45612e+06	1.4618e+06	11.549	12.178	0.629	133.379	148.304	1.33777	1.64307	0.305302
52	2	19	2	1	1	3	2	2	1	6	1	2	2	2	2	2	1	2	2	1.5	1.5	0	23.9361	24.15	0.213938	20	21.07	1.07	4.47214	4.59021	97.2222	99.02	1.79778	79.961	81.671	1.71	1047.4	1078.3	30.9	1.09705e+06	1.16273e+06	10.613	11.351	0.738	112.636	128.845	1.12771	1.38462	0.256905
[truncated: 45 more columns]
